# Supplementary material for: Cell Wall Integrity Pathway Involved in Morphogenesis, Virulence and Antifungal Susceptibility in Cryptococcus neoformans
Source: MDPI journal article supplement (doi:10.3390/jof7100831), 2021-10-05
Supplement: s1 [file s1]

Table S1. Components of the CWI pathway in *Saccharomyces cerevisiae* and *Cryptococcus neoformans*

| <i>Saccharomyces cerevisiae</i> | <i>Cryptococcus neoformans</i> |
|---------------------------------|--------------------------------|
| Cell Surface sensors            |                                |
| Wsc1                            | CNAG_03308 homologue Mtl1/Mid2 |
| Wsc2                            |                                |
| Wsc3                            |                                |
| Mid2                            |                                |
| Mlt1                            |                                |
| GDP/GTP Exchange factors        |                                |
| Rom1                            | Rom2                           |
| Rom2                            | Rom20                          |
|                                 | Rom21                          |
| Protein Kinase C                |                                |
| Pkc1                            | Pkc1                           |
| GTPases                         |                                |
| Rho1                            | Rho1                           |
| Rho2                            | Rho10                          |
| Rho5                            | Rho11                          |
| MAPK module                     |                                |
| Bck1                            | Bck1                           |
| Mkk1                            |                                |
| Mkk2                            | Mkk2                           |
| Slr2                            | Mpk1                           |
| Transcription factors           |                                |
| Rlm1                            | CNAG_03998 (homologue Rlm1)    |
| Swi4                            | CNAG_07464 (homologue Swi4)    |
| Swi6                            | CNAG_01438 (homologue Swi6)    |
